# Supplementary material for: The first checklist of alien vascular plants of Kyrgyzstan, with new records and critical evaluation of earlier data. Contribution 1
Source: Biodivers Data J. 2021 Nov 9;9:e75590. doi: 10.3897/BDJ.9.e75590 (PMC8595221; doi:10.3897/BDJ.9.e75590)
Supplement: Supplementary material 1 — Occurrence records of alien plants from Kyrgyzstan (contribution 1) [file bdj-09-e75590-s001.xlsx]

## Sheet: Sheet1
occurrenceID	type	modified	language	license	rightsHolder	accessRights	institutionID	collectionID	datasetID	institutionCode	datasetName	ownerInstitutionCode	basisOfRecord	recordedBy	occurrenceStatus	associatedReferences	year	month	day	eventRemarks	continent	country	countryCode	stateProvince	locality	habitat	verbatimLocality	maximumElevationInMeters	establishmentMeans	decimalLatitude	decimalLongitude	geodeticDatum	coordinateUncertaintyInMeters	georeferencedBy	identifiedBy	identifiedByID	scientificName	kingdom	phylum	class	order	family	genus	specificEpithet	taxonRank	references	catalogNumber
aliens_of_Kyrgyzstan_1	dataset	2021-09-06	en	http://creativecommons.org/licenses/by/4.0/legalcode	Institute for Biology of National Academy of Sci.	use under CC BY 4.0	http://grbio.org/institution/national-academy-science-kyrgyzstan	urn:lsid:biocol.org:col:13699	kirgalienplants	FRU	Alien plants of Kyrgyzstan	FRU	PreservedSpecimen	Aidarova R.	present		1985	8	10		Asia	Kyrgyzstan	KG	Ysyk-Köl	Küngöy Alatoo (S side), Kichi-Sogotu River	river side	Иссык-Кульская обл., хребет Кунгей Ала-тоо, южный склон, пойма р. Кичи-Соготу	1700	introduced	42.684	77.306	WGS84	500	Alexander Sennikov	Georgy Lazkov	0000-0002-3531-8524	Xanthium orientale L.	Plantae	Tracheophyta	Magnoliopsida	Asterales	Asteraceae	Xanthium	orientale	species
aliens_of_Kyrgyzstan_2	dataset	2021-09-06	en	http://creativecommons.org/licenses/by/4.0/legalcode	Institute for Biology of National Academy of Sci.	use under CC BY 4.0	http://grbio.org/institution/national-academy-science-kyrgyzstan	urn:lsid:biocol.org:col:13699	kirgalienplants	FRU	Alien plants of Kyrgyzstan	FRU	PreservedSpecimen	Ganybaeva M.	present		2007	6	26		Asia	Kyrgyzstan	KG	Batken	Turkestan Range, Beles-Mazar		Туркестанский хр., междуречье Исфана и Ляйляк, уроч. Белес-Мазар	1200	introduced	39.874	69.85	WGS84	500	Alexander Sennikov	Georgy Lazkov	0000-0002-3531-8524	Xanthium orientale L.	Plantae	Tracheophyta	Magnoliopsida	Asterales	Asteraceae	Xanthium	orientale	species
aliens_of_Kyrgyzstan_3	dataset	2021-09-06	en	http://creativecommons.org/licenses/by/4.0/legalcode	Institute for Biology of National Academy of Sci.	use under CC BY 4.0	http://grbio.org/institution/national-academy-science-kyrgyzstan	urn:lsid:biocol.org:col:13699	kirgalienplants	FRU	Alien plants of Kyrgyzstan	FRU	PreservedSpecimen	Gorbunova N.	present		1986	8	29		Asia	Kyrgyzstan	KG	Bishkek	Bishkek, Pobeda Square	lawn	Г. Фрунзе, площадь Победы, неполиваемые газоны	800	introduced	42.8803	74.6161	WGS84	200	Alexander Sennikov	Georgy Lazkov	0000-0002-3531-8524	Xanthium orientale L.	Plantae	Tracheophyta	Magnoliopsida	Asterales	Asteraceae	Xanthium	orientale	species
aliens_of_Kyrgyzstan_4	dataset	2021-09-06	en	http://creativecommons.org/licenses/by/4.0/legalcode	Institute for Biology of National Academy of Sci.	use under CC BY 4.0	http://grbio.org/institution/national-academy-science-kyrgyzstan	urn:lsid:biocol.org:col:13699	kirgalienplants	FRU	Alien plants of Kyrgyzstan	FRU	PreservedSpecimen	Gorbunova N. | Ukurchinova A.	present		1989	9	27		Asia	Kyrgyzstan	KG	Chü	Kyrgyz Range, Ala-Archa River	river side	Киргизский хр., сев. макросклон, пойма р. Ала-Арча, 2000 м н. у. м.	2000	introduced	42.5806	74.4821	WGS84	50	Alexander Sennikov	Georgy Lazkov	0000-0002-3531-8524	Xanthium orientale L.	Plantae	Tracheophyta	Magnoliopsida	Asterales	Asteraceae	Xanthium	orientale	species
aliens_of_Kyrgyzstan_5	dataset	2021-09-06	en	http://creativecommons.org/licenses/by/4.0/legalcode	Institute for Biology of National Academy of Sci.	use under CC BY 4.0	http://grbio.org/institution/national-academy-science-kyrgyzstan	urn:lsid:biocol.org:col:13699	kirgalienplants	FRU	Alien plants of Kyrgyzstan	FRU	PreservedSpecimen	Arbaeva et al.	present		1968	7		day of month unknown	Asia	Kyrgyzstan	KG	Chü	Kyrgyz Range, Ala-Archa River		Ошская обл., Ферганский хр., бассейн реки Кугарт, с. Сузак	800	introduced	40.9	72.9	WGS84	500	Alexander Sennikov	Georgy Lazkov	0000-0002-3531-8524	Xanthium orientale L.	Plantae	Tracheophyta	Magnoliopsida	Asterales	Asteraceae	Xanthium	orientale	species
aliens_of_Kyrgyzstan_6	dataset	2021-09-06	en	http://creativecommons.org/licenses/by/4.0/legalcode	Institute for Biology of National Academy of Sci.	use under CC BY 4.0	http://grbio.org/institution/national-academy-science-kyrgyzstan	urn:lsid:biocol.org:col:13699	kirgalienplants	FRU	Alien plants of Kyrgyzstan	FRU	PreservedSpecimen	Gorbunova N. et al.	present		1990	8	19		Asia	Kyrgyzstan	KG	Chü	Kyrgyz Range, Paspeldyk Mt.	river side	Окр. с. Чон-Арык, гора Паспельдык, подгорная равнина с уклоном на восток, днище сая суглинистое	1150	introduced	42.7935	74.5674	WGS84	250	Alexander Sennikov	Georgy Lazkov	0000-0002-3531-8524	Xanthium orientale L.	Plantae	Tracheophyta	Magnoliopsida	Asterales	Asteraceae	Xanthium	orientale	species
aliens_of_Kyrgyzstan_7	dataset	2021-09-06	en	http://creativecommons.org/licenses/by/4.0/legalcode	Institute for Biology of National Academy of Sci.	use under CC BY 4.0	http://grbio.org/institution/national-academy-science-kyrgyzstan	urn:lsid:biocol.org:col:13699	kirgalienplants	FRU	Alien plants of Kyrgyzstan	FRU	PreservedSpecimen	Gorbunova N.	present		1978	8	24		Asia	Kyrgyzstan	KG	Chü	Kyrgyz Range (N side), Taldy-Bulak	river side	Киргизский Алатау, сев. макросклон, уроч. Талды-булак, окр. стационара, галечниковое русло речки	1400	introduced	42.6455	73.9501	WGS84	50	Alexander Sennikov	Georgy Lazkov	0000-0002-3531-8524	Xanthium orientale L.	Plantae	Tracheophyta	Magnoliopsida	Asterales	Asteraceae	Xanthium	orientale	species
aliens_of_Kyrgyzstan_8	dataset	2021-09-06	en	http://creativecommons.org/licenses/by/4.0/legalcode	Plantarium	use under CC BY 4.0	Plantarium	Plantarium	kirgalienplants	Plantarium	Alien plants of Kyrgyzstan	Plantarium	HumanObservation	Chulanova G.	present		2015	3	23		Asia	Kyrgyzstan	KG	Chü	East of Orto-Say Village		вдоль грунтовой дороги в предгорье восточнее с. Орто-Сай	920	introduced	42.8064	74.616	WGS84	100	Alexander Sennikov	Alexander Sennikov	0000-0001-6664-7657	Xanthium orientale L.	Plantae	Tracheophyta	Magnoliopsida	Asterales	Asteraceae	Xanthium	orientale	species	https://www.plantarium.ru/page/image/id/420232.html
aliens_of_Kyrgyzstan_9	dataset	2021-09-06	en	http://creativecommons.org/licenses/by/4.0/legalcode	Institute for Biology of National Academy of Sci.	use under CC BY 4.0	http://grbio.org/institution/national-academy-science-kyrgyzstan	urn:lsid:biocol.org:col:13699	kirgalienplants	FRU	Alien plants of Kyrgyzstan	FRU	PreservedSpecimen	Drobov V. | Kudryashov S.	present		1929	8	9		Asia	Kyrgyzstan	KG	Naryn	Kyrgyz Range (S side), Kyzyl-Kainar Spring		Южный склон Александровского хр., у родника Кзыл-Кайнар	2100	introduced	42.297	75.564	WGS84	50	Alexander Sennikov	Georgy Lazkov	0000-0002-3531-8524	Xanthium strumarium L.	Plantae	Tracheophyta	Magnoliopsida	Asterales	Asteraceae	Xanthium	strumarium	species
aliens_of_Kyrgyzstan_10	dataset	2021-09-06	en	http://creativecommons.org/licenses/by/4.0/legalcode	Institute for Biology of National Academy of Sci.	use under CC BY 4.0	http://grbio.org/institution/national-academy-science-kyrgyzstan	urn:lsid:biocol.org:col:13699	kirgalienplants	FRU	Alien plants of Kyrgyzstan	FRU	PreservedSpecimen	Vykhodtsev I.	present		1930	7	26		Asia	Kyrgyzstan	KG	Jalal-Abad	Vicinity of Özgön Town	field weed	Узгенский район, окр. г. Узгена, посевы	1000	introduced	40.78	73.27	WGS84	1000	Alexander Sennikov	Georgy Lazkov	0000-0002-3531-8524	Xanthium strumarium L.	Plantae	Tracheophyta	Magnoliopsida	Asterales	Asteraceae	Xanthium	strumarium	species
aliens_of_Kyrgyzstan_11	dataset	2021-09-06	en	http://creativecommons.org/licenses/by/4.0/legalcode	Institute for Biology of National Academy of Sci.	use under CC BY 4.0	http://grbio.org/institution/national-academy-science-kyrgyzstan	urn:lsid:biocol.org:col:13699	kirgalienplants	FRU	Alien plants of Kyrgyzstan	FRU	PreservedSpecimen	Lebedeva | Faleeva	present		1956	8	13		Asia	Kyrgyzstan	KG	Batken	Right side of Leylek River		Ляйлякский район, Туркестанский хр., правобережье р. Ляйляк	700	introduced	40.05	69.75	WGS84	2500	Alexander Sennikov	Georgy Lazkov	0000-0002-3531-8524	Xanthium strumarium L.	Plantae	Tracheophyta	Magnoliopsida	Asterales	Asteraceae	Xanthium	strumarium	species
aliens_of_Kyrgyzstan_12	dataset	2021-09-06	en	http://creativecommons.org/licenses/by/4.0/legalcode	Institute for Biology of National Academy of Sci.	use under CC BY 4.0	http://grbio.org/institution/national-academy-science-kyrgyzstan	urn:lsid:biocol.org:col:13699	kirgalienplants	FRU	Alien plants of Kyrgyzstan	FRU	PreservedSpecimen	Kaschenko | Aidarova	present		1953	5	9		Asia	Kyrgyzstan	KG	Chü	Milanfan collective farm		Колхоз Милянфан	650	introduced	42.96	74.79	WGS84	2500	Alexander Sennikov	Georgy Lazkov	0000-0002-3531-8524	Xanthium strumarium L.	Plantae	Tracheophyta	Magnoliopsida	Asterales	Asteraceae	Xanthium	strumarium	species
aliens_of_Kyrgyzstan_13	dataset	2021-09-06	en	http://creativecommons.org/licenses/by/4.0/legalcode	Institute for Biology of National Academy of Sci.	use under CC BY 4.0	http://grbio.org/institution/national-academy-science-kyrgyzstan	urn:lsid:biocol.org:col:13699	kirgalienplants	FRU	Alien plants of Kyrgyzstan	FRU	PreservedSpecimen	Agafonova T.	present		1932	8	27		Asia	Kyrgyzstan	KG	Chü	Kyrgyz Range, Paspeldyk Mt.		Шлейфы горы Паспельдык в окрестности кормовой станции	1100	introduced	42.7935	74.5674	WGS84	1000	Alexander Sennikov	Georgy Lazkov	0000-0002-3531-8524	Xanthium strumarium L.	Plantae	Tracheophyta	Magnoliopsida	Asterales	Asteraceae	Xanthium	strumarium	species
aliens_of_Kyrgyzstan_14	dataset	2021-09-06	en	http://creativecommons.org/licenses/by/4.0/legalcode	Institute for Biology of National Academy of Sci.	use under CC BY 4.0	http://grbio.org/institution/national-academy-science-kyrgyzstan	urn:lsid:biocol.org:col:13699	kirgalienplants	FRU	Alien plants of Kyrgyzstan	FRU	PreservedSpecimen	Faleeva | Lebedeva	present		1955	8	2		Asia	Kyrgyzstan	KG	Jalal-Abad	Fergana Range, Tamchi-Bulak		Базар-Курганский район, Ферганский хр., уроч. Тамчи-Булак	800	introduced	41.05	72.81	WGS84	2000	Alexander Sennikov	Georgy Lazkov	0000-0002-3531-8524	Xanthium strumarium L.	Plantae	Tracheophyta	Magnoliopsida	Asterales	Asteraceae	Xanthium	strumarium	species
aliens_of_Kyrgyzstan_15	dataset	2021-09-06	en	http://creativecommons.org/licenses/by/4.0/legalcode	Institute for Biology of National Academy of Sci.	use under CC BY 4.0	http://grbio.org/institution/national-academy-science-kyrgyzstan	urn:lsid:biocol.org:col:13699	kirgalienplants	FRU	Alien plants of Kyrgyzstan	FRU	PreservedSpecimen	Nikitina | Sudnitsyna	present		1959	9	6		Asia	Kyrgyzstan	KG	Ysyk-Köl	vicinity of Cholpon-Ata		Кунгей Ала-Тоо, окр. с. Чолпон-Ата, предгорья, 1 к/з к востоку от с.	1700	introduced	42.66	77.11	WGS84	500	Alexander Sennikov	Georgy Lazkov	0000-0002-3531-8524	Xanthium strumarium L.	Plantae	Tracheophyta	Magnoliopsida	Asterales	Asteraceae	Xanthium	strumarium	species
aliens_of_Kyrgyzstan_16	dataset	2021-09-06	en	http://creativecommons.org/licenses/by/4.0/legalcode	Institute for Biology of National Academy of Sci.	use under CC BY 4.0	http://grbio.org/institution/national-academy-science-kyrgyzstan	urn:lsid:biocol.org:col:13699	kirgalienplants	FRU	Alien plants of Kyrgyzstan	FRU	PreservedSpecimen	Aidarova | Ubukeeva	present		1957	8	20		Asia	Kyrgyzstan	KG	Jalal-Abad	Örnek collective farm	field weed	Тогуз-Тороузский район, к-з «Урнек», среди посевов сорняк	2100	introduced	41.47	74.34	WGS84	1000	Alexander Sennikov	Georgy Lazkov	0000-0002-3531-8524	Xanthium strumarium L.	Plantae	Tracheophyta	Magnoliopsida	Asterales	Asteraceae	Xanthium	strumarium	species
aliens_of_Kyrgyzstan_17	dataset	2021-09-06	en	http://creativecommons.org/licenses/by/4.0/legalcode	Institute for Biology of National Academy of Sci.	use under CC BY 4.0	http://grbio.org/institution/national-academy-science-kyrgyzstan	urn:lsid:biocol.org:col:13699	kirgalienplants	FRU	Alien plants of Kyrgyzstan	FRU	PreservedSpecimen	Nikitina | Gorbunova	present		1963	9	22		Asia	Kyrgyzstan	KG	Chü	Ala-Archa River near Bishkek		Окрестности г. Фрунзе, левая сторона р. Ала-Арча, хозяйство горбольницы, холмы	1100	introduced	42.76	74.57	WGS84	500	Alexander Sennikov	Georgy Lazkov	0000-0002-3531-8524	Xanthium strumarium L.	Plantae	Tracheophyta	Magnoliopsida	Asterales	Asteraceae	Xanthium	strumarium	species
aliens_of_Kyrgyzstan_18	dataset	2021-09-06	en	http://creativecommons.org/licenses/by/4.0/legalcode	Institute for Biology of National Academy of Sci.	use under CC BY 4.0	http://grbio.org/institution/national-academy-science-kyrgyzstan	urn:lsid:biocol.org:col:13699	kirgalienplants	FRU	Alien plants of Kyrgyzstan	FRU	PreservedSpecimen	Aidarova | Gorbunova	present		1964	7	8		Asia	Kyrgyzstan	KG	Jalal-Abad	Jajal-Abad Town	roadside	Ошская обл., г. Джалал-Абад, во дворе управления орехо-плодовыми лесами	800	introduced	40.943	72.97	WGS84	500	Alexander Sennikov	Georgy Lazkov	0000-0002-3531-8524	Xanthium strumarium L.	Plantae	Tracheophyta	Magnoliopsida	Asterales	Asteraceae	Xanthium	strumarium	species
aliens_of_Kyrgyzstan_19	dataset	2021-09-06	en	http://creativecommons.org/licenses/by/4.0/legalcode	Institute for Biology of National Academy of Sci.	use under CC BY 4.0	http://grbio.org/institution/national-academy-science-kyrgyzstan	urn:lsid:biocol.org:col:13699	kirgalienplants	FRU	Alien plants of Kyrgyzstan	FRU	PreservedSpecimen	Aidarova et al.	present		1970	10	7		Asia	Kyrgyzstan	KG	Ysyk-Köl	Ottuk Village	roadside	Тонский район, окр. с. Оттук, лесопосадки с избыточным грунтовым увлажнением вдоль дороги	1700	introduced	42.311	76.285	WGS84	500	Alexander Sennikov	Georgy Lazkov	0000-0002-3531-8524	Xanthium strumarium L.	Plantae	Tracheophyta	Magnoliopsida	Asterales	Asteraceae	Xanthium	strumarium	species
aliens_of_Kyrgyzstan_20	dataset	2021-09-06	en	http://creativecommons.org/licenses/by/4.0/legalcode	Institute for Biology of National Academy of Sci.	use under CC BY 4.0	http://grbio.org/institution/national-academy-science-kyrgyzstan	urn:lsid:biocol.org:col:13699	kirgalienplants	FRU	Alien plants of Kyrgyzstan	FRU	PreservedSpecimen	Arbaeva	present		1965	8	17		Asia	Kyrgyzstan	KG	Bishkek	Bishkek, Sverdlov Street	roadside	Г. Фрунзе, ул. Свердлова	800	introduced	42.8732	74.581	WGS84	500	Alexander Sennikov	Georgy Lazkov	0000-0002-3531-8524	Xanthium strumarium L.	Plantae	Tracheophyta	Magnoliopsida	Asterales	Asteraceae	Xanthium	strumarium	species
aliens_of_Kyrgyzstan_21	dataset	2021-09-06	en	http://creativecommons.org/licenses/by/4.0/legalcode	Institute for Biology of National Academy of Sci.	use under CC BY 4.0	http://grbio.org/institution/national-academy-science-kyrgyzstan	urn:lsid:biocol.org:col:13699	kirgalienplants	FRU	Alien plants of Kyrgyzstan	FRU	PreservedSpecimen	Gorbunova N.	present		1966	8	29		Asia	Kyrgyzstan	KG	Bishkek	Bishkek, Sverdlov Street		Фрунзе, участок по ул. Свердлова [ул. Т. Уметалиева] (между ж.д. и ул. XXII партсъезда [пр. Чуй])	800	introduced	42.8732	74.581	WGS84	100	Alexander Sennikov	Georgy Lazkov	0000-0002-3531-8524	Xanthium strumarium L.	Plantae	Tracheophyta	Magnoliopsida	Asterales	Asteraceae	Xanthium	strumarium	species
aliens_of_Kyrgyzstan_22	dataset	2021-09-06	en	http://creativecommons.org/licenses/by/4.0/legalcode	Institute for Biology of National Academy of Sci.	use under CC BY 4.0	http://grbio.org/institution/national-academy-science-kyrgyzstan	urn:lsid:biocol.org:col:13699	kirgalienplants	FRU	Alien plants of Kyrgyzstan	FRU	PreservedSpecimen	Aidarova et al.	present		1973	7	5		Asia	Kyrgyzstan	KG	Jalal-Abad	Kara-Jigach	riverside	Токтогульский район, окр. уроч. Караджигач, левая сторона сая Тор-Колот	1050	introduced	41.8	73.285	WGS84	1000	Alexander Sennikov	Georgy Lazkov	0000-0002-3531-8524	Xanthium strumarium L.	Plantae	Tracheophyta	Magnoliopsida	Asterales	Asteraceae	Xanthium	strumarium	species
aliens_of_Kyrgyzstan_23	dataset	2021-09-06	en	http://creativecommons.org/licenses/by/4.0/legalcode	Institute for Biology of National Academy of Sci.	use under CC BY 4.0	http://grbio.org/institution/national-academy-science-kyrgyzstan	urn:lsid:biocol.org:col:13699	kirgalienplants	FRU	Alien plants of Kyrgyzstan	FRU	PreservedSpecimen	Gorbunova N.	present		1978	8	24		Asia	Kyrgyzstan	KG	Chü	Kyrgyz Range (N side), Taldy-Bulak	riverside	Киргизский Алатау, сев. макросклон, уроч. Талды-булак, окр. стационара, галечниковое русло речки	1400	introduced	42.6455	73.9501	WGS84	50	Alexander Sennikov	Georgy Lazkov	0000-0002-3531-8524	Xanthium strumarium L.	Plantae	Tracheophyta	Magnoliopsida	Asterales	Asteraceae	Xanthium	strumarium	species
aliens_of_Kyrgyzstan_24	dataset	2021-09-06	en	http://creativecommons.org/licenses/by/4.0/legalcode	Institute for Biology of National Academy of Sci.	use under CC BY 4.0	http://grbio.org/institution/national-academy-science-kyrgyzstan	urn:lsid:biocol.org:col:13699	kirgalienplants	FRU	Alien plants of Kyrgyzstan	FRU	PreservedSpecimen	Lazkov | Ömuralieva	present		1992	6	14		Asia	Kyrgyzstan	KG	Jalal-Abad	Tash-Kömür, coal mining		Г. Таш-Кумыр, окр. шахты Северной	700	introduced	41.38	72.223	WGS84	100	Alexander Sennikov	Georgy Lazkov	0000-0002-3531-8524	Xanthium spinosum L.	Plantae	Tracheophyta	Magnoliopsida	Asterales	Asteraceae	Xanthium	spinosum	species
aliens_of_Kyrgyzstan_25	dataset	2021-09-06	en	http://creativecommons.org/licenses/by/4.0/legalcode	Institute for Biology of National Academy of Sci.	use under CC BY 4.0	http://grbio.org/institution/national-academy-science-kyrgyzstan	urn:lsid:biocol.org:col:13699	kirgalienplants	FRU	Alien plants of Kyrgyzstan	FRU	PreservedSpecimen	Aidarova et al.	present		1977	6	22		Asia	Kyrgyzstan	KG	Jalal-Abad	left side of Naryn River opposite to Tash-Kömür Town		Ошская обл., предгорья Ферганского хр.. левый берег р. Нарын, против г. Таш-Кумыра, глинисто-щебн. обнажения, полынно-солянковая пустыня, с кустарниками	600	introduced	41.3335	72.213	WGS84	1000	Alexander Sennikov	Georgy Lazkov	0000-0002-3531-8524	Xanthium spinosum L.	Plantae	Tracheophyta	Magnoliopsida	Asterales	Asteraceae	Xanthium	spinosum	species
aliens_of_Kyrgyzstan_26	dataset	2021-09-06	en	http://creativecommons.org/licenses/by/4.0/legalcode	Institute for Biology of National Academy of Sci.	use under CC BY 4.0	http://grbio.org/institution/national-academy-science-kyrgyzstan	urn:lsid:biocol.org:col:13699	kirgalienplants	FRU	Alien plants of Kyrgyzstan	FRU	HumanObservation	Nikitina E.V.	present	Nikitina EV (1965) Comments on Xanthium spinosum L. In: Vykhodtsev IV (Ed.) Flora of Kirghizia, vol. 11. Science Publishers, Bishkek, 93 pp. [In Russian].	1942			date and month unknown	Asia	Kyrgyzstan	KG	Bishkek	Bishkek, at the railway station		Г. Фрунзе, около вокзала	800	introduced	42.864	74.605	WGS84	100	Alexander Sennikov	Georgy Lazkov	0000-0002-3531-8524	Xanthium spinosum L.	Plantae	Tracheophyta	Magnoliopsida	Asterales	Asteraceae	Xanthium	spinosum	species
aliens_of_Kyrgyzstan_27	dataset	2021-09-06	en	http://creativecommons.org/licenses/by/4.0/legalcode	Institute for Biology of National Academy of Sci.	use under CC BY 4.0	http://grbio.org/institution/national-academy-science-kyrgyzstan	urn:lsid:biocol.org:col:13699	kirgalienplants	FRU	Alien plants of Kyrgyzstan	FRU	PreservedSpecimen	Nikitina E.V.	present		1947	10	22		Asia	Kyrgyzstan	KG	Bishkek	Bishkek, at the railway station		Г. Фрунзе, около вокзала	800	introduced	42.864	74.605	WGS84	100	Alexander Sennikov	Georgy Lazkov	0000-0002-3531-8524	Xanthium spinosum L.	Plantae	Tracheophyta	Magnoliopsida	Asterales	Asteraceae	Xanthium	spinosum	species
aliens_of_Kyrgyzstan_28	dataset	2021-09-06	en	http://creativecommons.org/licenses/by/4.0/legalcode	Institute for Biology of National Academy of Sci.	use under CC BY 4.0	http://grbio.org/institution/national-academy-science-kyrgyzstan	urn:lsid:biocol.org:col:13699	kirgalienplants	FRU	Alien plants of Kyrgyzstan	FRU	PreservedSpecimen	Nikitina E.V.	present		1947	7	15		Asia	Kyrgyzstan	KG	Bishkek	Bishkek, southern part		Окр. г. Фрунзе, его южная часть	800	introduced	42.825	74.6	WGS84	500	Alexander Sennikov	Georgy Lazkov	0000-0002-3531-8524	Xanthium spinosum L.	Plantae	Tracheophyta	Magnoliopsida	Asterales	Asteraceae	Xanthium	spinosum	species
aliens_of_Kyrgyzstan_29	dataset	2021-09-06	en	http://creativecommons.org/licenses/by/4.0/legalcode	Institute for Biology of National Academy of Sci.	use under CC BY 4.0	http://grbio.org/institution/national-academy-science-kyrgyzstan	urn:lsid:biocol.org:col:13699	kirgalienplants	FRU	Alien plants of Kyrgyzstan	FRU	PreservedSpecimen	Shakhvorostova Yu.	present		1947	10	23		Asia	Kyrgyzstan	KG	Bishkek	Bishkek, along railways at the station		Вдоль полотна ж. д., к станции Пишпек	800	introduced	42.86	74.6	WGS84	500	Alexander Sennikov	Georgy Lazkov	0000-0002-3531-8524	Xanthium spinosum L.	Plantae	Tracheophyta	Magnoliopsida	Asterales	Asteraceae	Xanthium	spinosum	species
aliens_of_Kyrgyzstan_30	dataset	2021-09-06	en	http://creativecommons.org/licenses/by/4.0/legalcode	Institute for Biology of National Academy of Sci.	use under CC BY 4.0	http://grbio.org/institution/national-academy-science-kyrgyzstan	urn:lsid:biocol.org:col:13699	kirgalienplants	FRU	Alien plants of Kyrgyzstan	FRU	PreservedSpecimen	Novopokrovsky	present		1946	9	6		Asia	Kyrgyzstan	KG	Osh	Osh	irrigation channel	Г. Ош, сорное у арыка	1000	introduced	40.525	72.8	WGS84	1000	Alexander Sennikov	Georgy Lazkov	0000-0002-3531-8524	Xanthium spinosum L.	Plantae	Tracheophyta	Magnoliopsida	Asterales	Asteraceae	Xanthium	spinosum	species
aliens_of_Kyrgyzstan_31	dataset	2021-09-06	en	http://creativecommons.org/licenses/by/4.0/legalcode	Institute for Biology of National Academy of Sci.	use under CC BY 4.0	http://grbio.org/institution/national-academy-science-kyrgyzstan	urn:lsid:biocol.org:col:13699	kirgalienplants	FRU	Alien plants of Kyrgyzstan	FRU	PreservedSpecimen	Gorbunova N. et al.	present		1990	8	19		Asia	Kyrgyzstan	KG	Chü	Kyrgyz Range, Paspeldyk Mt.		Окр. с. Чон-Арык, гора Паспельдык, подгорная равнина с уклоном на восток, днище сая суглинистое	1150	introduced	42.7935	74.5674	WGS84	250	Alexander Sennikov	Georgy Lazkov	0000-0002-3531-8524	Xanthium spinosum L.	Plantae	Tracheophyta	Magnoliopsida	Asterales	Asteraceae	Xanthium	spinosum	species
aliens_of_Kyrgyzstan_32	dataset	2021-09-06	en	http://creativecommons.org/licenses/by/4.0/legalcode	Komarov Botanical Institute of RAS	use under CC BY 4.0	http://grbio.org/institution/v-l-komarov-botanical-institute	urn:lsid:biocol.org:col:15844	kirgalienplants	LE	Alien plants of Kyrgyzstan	LE	PreservedSpecimen	Gorbunova N.	present		1987	6	20		Asia	Kyrgyzstan	KG	Chü	Kyrgyz Range, Paspeldyk Mt.		Окр. с. Джал, у подножия западного склона горы Паспельдык	1000	introduced	42.79	74.52	WGS84	100	Alexander Sennikov	Georgy Lazkov	0000-0002-3531-8524	Xanthium spinosum L.	Plantae	Tracheophyta	Magnoliopsida	Asterales	Asteraceae	Xanthium	spinosum	species
aliens_of_Kyrgyzstan_33	dataset	2021-09-06	en	http://creativecommons.org/licenses/by/4.0/legalcode	Komarov Botanical Institute of RAS	use under CC BY 4.0	http://grbio.org/institution/v-l-komarov-botanical-institute	urn:lsid:biocol.org:col:15844	kirgalienplants	LE	Alien plants of Kyrgyzstan	LE	PreservedSpecimen	Gorbunova N.	present		1985	7	24		Asia	Kyrgyzstan	KG	Chü	Kyrgyz Range (N side), Taldy-Bulak		Киргизский Алатау, сев. макросклон, уроч. Талды-булак	1250	introduced	42.6602	73.9438	WGS84	50	Alexander Sennikov	Georgy Lazkov	0000-0002-3531-8524	Xanthium spinosum L.	Plantae	Tracheophyta	Magnoliopsida	Asterales	Asteraceae	Xanthium	spinosum	species
aliens_of_Kyrgyzstan_34	dataset	2021-09-06	en	http://creativecommons.org/licenses/by/4.0/legalcode	Komarov Botanical Institute of RAS	use under CC BY 4.0	http://grbio.org/institution/v-l-komarov-botanical-institute	urn:lsid:biocol.org:col:15844	kirgalienplants	LE	Alien plants of Kyrgyzstan	LE	PreservedSpecimen	Aidarova et al.	present		1977	6	22		Asia	Kyrgyzstan	KG	Jalal-Abad	left side of Naryn River opposite to Tash-Kömür Town		Ошская обл., предгорья Ферганского хр.. левый берег р. Нарын, против г. Таш-Кумыра, глинисто-щебн. обнажения, полынно-солянковая пустыня, с кустарниками	600	introduced	41.3335	72.213	WGS84	1000	Alexander Sennikov	Georgy Lazkov	0000-0002-3531-8524	Xanthium spinosum L.	Plantae	Tracheophyta	Magnoliopsida	Asterales	Asteraceae	Xanthium	spinosum	species
aliens_of_Kyrgyzstan_35	dataset	2021-09-06	en	http://creativecommons.org/licenses/by/4.0/legalcode	Institute for Biology of National Academy of Sci.	use under CC BY 4.0	http://grbio.org/institution/national-academy-science-kyrgyzstan	urn:lsid:biocol.org:col:13699	kirgalienplants	FRU	Alien plants of Kyrgyzstan	FRU	PreservedSpecimen	Sennikov A.N. | Lazkov G.A.	present		2016	7	10		Asia	Kyrgyzstan	KG	Jalal-Abad	road along Naryn River, ruderal places at a gasoline station	ruderal place	road along Naryn River, ruderal places at a gasoline station	800	introduced	41.5156	72.4493	WGS84	10	Alexander Sennikov	Georgy Lazkov	0000-0002-3531-8524	Bidens tinctoria (Nutt.) Baill.	Plantae	Tracheophyta	Magnoliopsida	Asterales	Asteraceae	Bidens	tinctoria	species
aliens_of_Kyrgyzstan_36	dataset	2021-09-06	en	http://creativecommons.org/licenses/by/4.0/legalcode	Komarov Botanical Institute of RAS	use under CC BY 4.0	http://grbio.org/institution/v-l-komarov-botanical-institute	urn:lsid:biocol.org:col:15844	kirgalienplants	LE	Alien plants of Kyrgyzstan	LE	PreservedSpecimen	Lazkov G.	present		2009	8	1		Asia	Kyrgyzstan	KG	Jalal-Abad	Sary-Chelek Nature Reserve, near Kyla-Köl Lake	roadside	Сары-Челекский заповедник, у озера Кыла-Кель	1880	introduced	41.8601	71.9762	WGS84	5	Alexander Sennikov	Alexander Sennikov	0000-0001-6664-7657	Bunias orientalis L.	Plantae	Tracheophyta	Magnoliopsida	Brassicales	Brassicaceae	Bunias	orientalis	species
aliens_of_Kyrgyzstan_37	dataset	2021-09-06	en	http://creativecommons.org/licenses/by/4.0/legalcode	Institute for Biology of National Academy of Sci.	use under CC BY 4.0	http://grbio.org/institution/national-academy-science-kyrgyzstan	urn:lsid:biocol.org:col:13699	kirgalienplants	FRU	Alien plants of Kyrgyzstan	FRU	PreservedSpecimen	Ganybaeva M.	present		2021	5	29		Asia	Kyrgyzstan	KG	Naryn	Near Acha-Kayyngdy Village		Ат-Башинский хребет, за селом Ача-Каинды, залежах Кара жон, место для полива и стрижки сена	2150	introduced	41.134	75.824	WGS84	1000	Alexander Sennikov	Georgy Lazkov	0000-0002-3531-8524	Bunias orientalis L.	Plantae	Tracheophyta	Magnoliopsida	Brassicales	Brassicaceae	Bunias	orientalis	species
aliens_of_Kyrgyzstan_38	dataset	2021-09-06	en	http://creativecommons.org/licenses/by/4.0/legalcode	Plantarium	use under CC BY 4.0	Plantarium	Plantarium	kirgalienplants	Plantarium	Alien plants of Kyrgyzstan	Plantarium	HumanObservation	Chulanova G.	present		2015	6	30		Asia	Kyrgyzstan	KG	Bishkek City	city yards next to the old Botanical Garden (along Minin str.)	lawns	Бишкек, пустырь	800	introduced	42.862	74.588	WGS84	100	Alexander Sennikov	Alexander Sennikov	0000-0001-6664-7657	Erigeron lilacinus (Sennikov & Kurtto) Sennikov	Plantae	Tracheophyta	Magnoliopsida	Asterales	Asteraceae	Erigeron	lilacinus	species	https://www.plantarium.ru/page/image/id/402198.html
aliens_of_Kyrgyzstan_39	dataset	2021-09-06	en	http://creativecommons.org/licenses/by/4.0/legalcode	Institute for Biology of National Academy of Sci.	use under CC BY 4.0	http://grbio.org/institution/national-academy-science-kyrgyzstan	urn:lsid:biocol.org:col:13699	kirgalienplants	FRU	Alien plants of Kyrgyzstan	FRU	HumanObservation	Lazkov G.	present		2020	6	11		Asia	Kyrgyzstan	KG	Bishkek City	Panfilov Street, at the clinics		Бишкек, ул. Панфилова, на клумбе у поликлиники	800	introduced	42.8741	74.6007	WGS84	10	Alexander Sennikov	Alexander Sennikov	0000-0001-6664-7657	Erigeron lilacinus (Sennikov & Kurtto) Sennikov	Plantae	Tracheophyta	Magnoliopsida	Asterales	Asteraceae	Erigeron	lilacinus	species
aliens_of_Kyrgyzstan_40	dataset	2021-09-06	en	http://creativecommons.org/licenses/by/4.0/legalcode	Plantarium	use under CC BY 4.0	Plantarium	Plantarium	kirgalienplants	Plantarium	Alien plants of Kyrgyzstan	Plantarium	HumanObservation	Chulanova G.	present		2011	8	7		Asia	Kyrgyzstan	KG	Ysyk-Köl	Kosh-Köl, holiday hotel ‘Ak-Jol’	lawns	Иссык-Кульская обл., территория пансионата Ак-Жол	1700	introduced	42.5311	76.6245	WGS84	100	Alexander Sennikov	Alexander Sennikov	0000-0001-6664-7657	Erigeron lilacinus (Sennikov & Kurtto) Sennikov	Plantae	Tracheophyta	Magnoliopsida	Asterales	Asteraceae	Erigeron	lilacinus	species	https://www.plantarium.ru/page/image/id/173869.html
aliens_of_Kyrgyzstan_41	dataset	2021-09-06	en	http://creativecommons.org/licenses/by/4.0/legalcode	University of Helsinki	use under CC BY 4.0	http://grbio.org/institution/university-helsinki	urn:lsid:biocol.org:col:14618	kirgalienplants	H	Alien plants of Kyrgyzstan	H	PreservedSpecimen	Sennikov A.N. | Lazkov G.A.	present		2016	7	12		Asia	Kyrgyzstan	KG	Jalal-Abad	Sary-Chelek Nature Reserve, Arkyt Village	yard		1300	introduced	41.8025	71.9626	WGS84	10	Alexander Sennikov	Alexander Sennikov	0000-0001-6664-7657	Erigeron annuus (L.) Desf.	Plantae	Tracheophyta	Magnoliopsida	Asterales	Asteraceae	Erigeron	annuus	species
aliens_of_Kyrgyzstan_42	dataset	2021-09-06	en	http://creativecommons.org/licenses/by/4.0/legalcode	University of Helsinki	use under CC BY 4.0	http://grbio.org/institution/university-helsinki	urn:lsid:biocol.org:col:14618	kirgalienplants	H	Alien plants of Kyrgyzstan	H	PreservedSpecimen	Uotila P.	present		2009	7	30		Asia	Kyrgyzstan	KG	Jalal-Abad	SW side of Kara-Suu river, between the river and the main road	open pastured riverside grasslands along an artificial brook		1100	introduced	41.685	72.007	WGS84	10	Pertti Uotila	Alexander Sennikov	0000-0001-6664-7657	Erigeron annuus (L.) Desf.	Plantae	Tracheophyta	Magnoliopsida	Asterales	Asteraceae	Erigeron	annuus	species		H1747501
aliens_of_Kyrgyzstan_43	dataset	2021-09-06	en	http://creativecommons.org/licenses/by/4.0/legalcode	University of Helsinki	use under CC BY 4.0	http://grbio.org/institution/university-helsinki	urn:lsid:biocol.org:col:14618	kirgalienplants	H	Alien plants of Kyrgyzstan	H	PreservedSpecimen	Sennikov A.N. | Lazkov G.A.	present		2010	7	19		Asia	Kyrgyzstan	KG	Jalal-Abad	Sary-Chelek Nature Reserve, 15 km S of Arkyt village, SW-facing slope to Kojo-Ata river valley	along an artificial brook, grassland		1000	introduced	41.6772	72.0266	WGS84	10	Alexander Sennikov	Alexander Sennikov	0000-0001-6664-7657	Erigeron annuus (L.) Desf.	Plantae	Tracheophyta	Magnoliopsida	Asterales	Asteraceae	Erigeron	annuus	species		H1750538
aliens_of_Kyrgyzstan_44	dataset	2021-09-06	en	http://creativecommons.org/licenses/by/4.0/legalcode	Academy of Science, Uzbekistan	use under CC BY 4.0	http://grbio.org/institution/academy-science-uzbekistan	urn:lsid:biocol.org:col:13701	kirgalienplants	TASH	Alien plants of Kyrgyzstan	TASH	PreservedSpecimen	Kudriashev S.	present		1931	8	2		Asia	Kyrgyzstan	KG	Talas	Echkile-Too, southern side, foothills		Ичкеле-Тау, южный склон, подошва гор	1000	introduced	42.599	71.839	WGS84	10000	Alexander Sennikov	Alexander Sennikov	0000-0001-6664-7657	Xanthium strumarium L.	Plantae	Tracheophyta	Magnoliopsida	Asterales	Asteraceae	Xanthium	strumarium	species
aliens_of_Kyrgyzstan_45	dataset	2021-09-06	en	http://creativecommons.org/licenses/by/4.0/legalcode	Academy of Science, Uzbekistan	use under CC BY 4.0	http://grbio.org/institution/academy-science-uzbekistan	urn:lsid:biocol.org:col:13701	kirgalienplants	TASH	Alien plants of Kyrgyzstan	TASH	PreservedSpecimen	Kudriashev S.	present		1931	7	29		Asia	Kyrgyzstan	KG	Talas	Pokrovka Village		равнина между горами Акташ и Киргизским Алатау, у реки Талас	800	introduced	42.73	71.589	WGS84	500	Alexander Sennikov	Alexander Sennikov	0000-0001-6664-7657	Xanthium strumarium L.	Plantae	Tracheophyta	Magnoliopsida	Asterales	Asteraceae	Xanthium	strumarium	species
aliens_of_Kyrgyzstan_46	dataset	2021-09-06	en	http://creativecommons.org/licenses/by/4.0/legalcode	Academy of Science, Uzbekistan	use under CC BY 4.0	http://grbio.org/institution/academy-science-uzbekistan	urn:lsid:biocol.org:col:13701	kirgalienplants	TASH	Alien plants of Kyrgyzstan	TASH	PreservedSpecimen	Rozhevits R.	present		1915	7	26		Asia	Kyrgyzstan	KG	Jalal-Abad	confluence of Kojo-Ata and Kara-Suu rivers		у слияния рек Ходжа-ата и Карасу	950	introduced	41.67	72.04	WGS84	100	Alexander Sennikov	Alexander Sennikov	0000-0001-6664-7657	Xanthium strumarium L.	Plantae	Tracheophyta	Magnoliopsida	Asterales	Asteraceae	Xanthium	strumarium	species
aliens_of_Kyrgyzstan_47	dataset	2021-09-06	en	http://creativecommons.org/licenses/by/4.0/legalcode	Academy of Science, Uzbekistan	use under CC BY 4.0	http://grbio.org/institution/academy-science-uzbekistan	urn:lsid:biocol.org:col:13701	kirgalienplants	TASH	Alien plants of Kyrgyzstan	TASH	PreservedSpecimen	Goncharova P.	present		1951			date and month unknown	Asia	Kyrgyzstan	KG	Chü	Tokmok		Токмак	900	introduced	42.82	75.308	WGS84	500	Alexander Sennikov	Alexander Sennikov	0000-0001-6664-7657	Xanthium strumarium L.	Plantae	Tracheophyta	Magnoliopsida	Asterales	Asteraceae	Xanthium	strumarium	species
aliens_of_Kyrgyzstan_48	dataset	2021-09-06	en	http://creativecommons.org/licenses/by/4.0/legalcode	Institute for Biology of National Academy of Sci.	use under CC BY 4.0	http://grbio.org/institution/national-academy-science-kyrgyzstan	urn:lsid:biocol.org:col:13699	kirgalienplants	FRU	Alien plants of Kyrgyzstan	FRU	PreservedSpecimen	Lazkov G.	present		2021	8	15		Asia	Kyrgyzstan	KG	Jalal-Abad	Gumxana Village		окр. с. Гумхана, на заброшенном огороде	1350	introduced	41.3185	72.9619	WGS84	200	Alexander Sennikov	Georgy Lazkov	0000-0002-3531-8524	Xanthium orientale L.	Plantae	Tracheophyta	Magnoliopsida	Asterales	Asteraceae	Xanthium	orientale	species
aliens_of_Kyrgyzstan_49	dataset	2021-09-06	en	http://creativecommons.org/licenses/by/4.0/legalcode	Institute for Biology of National Academy of Sci.	use under CC BY 4.0	http://grbio.org/institution/national-academy-science-kyrgyzstan	urn:lsid:biocol.org:col:13699	kirgalienplants	FRU	Alien plants of Kyrgyzstan	FRU	HumanObservation	Lazkov G.	present		2021	8	16		Asia	Kyrgyzstan	KG	Jalal-Abad	Toskool River	forest road	по реке Тоскол, лесная дорога	1270	introduced	41.213	72.6999	WGS84	5	Georgy Lazkov	Georgy Lazkov	0000-0002-3531-8524	Xanthium spinosum L.	Plantae	Tracheophyta	Magnoliopsida	Asterales	Asteraceae	Xanthium	spinosum	species
aliens_of_Kyrgyzstan_50	dataset	2021-09-06	en	http://creativecommons.org/licenses/by/4.0/legalcode	Institute for Biology of National Academy of Sci.	use under CC BY 4.0	http://grbio.org/institution/national-academy-science-kyrgyzstan	urn:lsid:biocol.org:col:13699	kirgalienplants	FRU	Alien plants of Kyrgyzstan	FRU	HumanObservation	Lazkov G.	present		2021	8	17		Asia	Kyrgyzstan	KG	Jalal-Abad	Arstanbap			1675	introduced	41.3489	72.9115	WGS84	5	Georgy Lazkov	Georgy Lazkov	0000-0002-3531-8524	Xanthium spinosum L.	Plantae	Tracheophyta	Magnoliopsida	Asterales	Asteraceae	Xanthium	spinosum	species
aliens_of_Kyrgyzstan_51	dataset	2021-09-06	en	http://creativecommons.org/licenses/by/4.0/legalcode	Institute for Biology of National Academy of Sci.	use under CC BY 4.0	http://grbio.org/institution/national-academy-science-kyrgyzstan	urn:lsid:biocol.org:col:13699	kirgalienplants	FRU	Alien plants of Kyrgyzstan	FRU	HumanObservation	Lazkov G.	present		2021	8	18		Asia	Kyrgyzstan	KG	Jalal-Abad	north of Kara-Jugach Village			1450	introduced	41.235	72.7027	WGS84	5	Georgy Lazkov	Georgy Lazkov	0000-0002-3531-8524	Xanthium orientale L.	Plantae	Tracheophyta	Magnoliopsida	Asterales	Asteraceae	Xanthium	orientale	species
aliens_of_Kyrgyzstan_52	dataset	2021-09-06	en	http://creativecommons.org/licenses/by/4.0/legalcode	Institute for Biology of National Academy of Sci.	use under CC BY 4.0	http://grbio.org/institution/national-academy-science-kyrgyzstan	urn:lsid:biocol.org:col:13699	kirgalienplants	FRU	Alien plants of Kyrgyzstan	FRU	HumanObservation	Lazkov G.	present		2021	8	18		Asia	Kyrgyzstan	KG	Jalal-Abad	north of Kara-Jugach Village			1450	introduced	41.235	72.7	WGS84	100	Georgy Lazkov	Georgy Lazkov	0000-0002-3531-8524	Xanthium spinosum L.	Plantae	Tracheophyta	Magnoliopsida	Asterales	Asteraceae	Xanthium	spinosum	species
aliens_of_Kyrgyzstan_53	dataset	2021-09-06	en	http://creativecommons.org/licenses/by/4.0/legalcode	Institute for Biology of National Academy of Sci.	use under CC BY 4.0	http://grbio.org/institution/national-academy-science-kyrgyzstan	urn:lsid:biocol.org:col:13699	kirgalienplants	FRU	Alien plants of Kyrgyzstan	FRU	HumanObservation	Lazkov G.	present		2021	8	20		Asia	Kyrgyzstan	KG	Jalal-Abad	north-west of Bazar-Korgon Village			770	introduced	41.0624	72.7036	WGS84	5	Georgy Lazkov	Georgy Lazkov	0000-0002-3531-8524	Xanthium spinosum L.	Plantae	Tracheophyta	Magnoliopsida	Asterales	Asteraceae	Xanthium	spinosum	species
aliens_of_Kyrgyzstan_54	dataset	2021-09-06	en	http://creativecommons.org/licenses/by/4.0/legalcode	Institute for Biology of National Academy of Sci.	use under CC BY 4.0	http://grbio.org/institution/national-academy-science-kyrgyzstan	urn:lsid:biocol.org:col:13699	kirgalienplants	FRU	Alien plants of Kyrgyzstan	FRU	HumanObservation	Lazkov G.	present		2021	8	20		Asia	Kyrgyzstan	KG	Jalal-Abad	mountains west of Jalal-Abad Town			800	introduced	40.9435	72.8301	WGS84	5	Georgy Lazkov	Georgy Lazkov	0000-0002-3531-8524	Xanthium orientale L.	Plantae	Tracheophyta	Magnoliopsida	Asterales	Asteraceae	Xanthium	orientale	species
aliens_of_Kyrgyzstan_55	dataset	2021-09-06	en	http://creativecommons.org/licenses/by/4.0/legalcode	Institute for Biology of National Academy of Sci.	use under CC BY 4.0	http://grbio.org/institution/national-academy-science-kyrgyzstan	urn:lsid:biocol.org:col:13699	kirgalienplants	FRU	Alien plants of Kyrgyzstan	FRU	HumanObservation	Lazkov G.	present		2021	8	19		Asia	Kyrgyzstan	KG	Jalal-Abad	Kyzyl-Suu River	gravelly riverside		1350	introduced	41.3142	72.9736	WGS84	5	Georgy Lazkov	Georgy Lazkov	0000-0002-3531-8524	Xanthium orientale L.	Plantae	Tracheophyta	Magnoliopsida	Asterales	Asteraceae	Xanthium	orientale	species
aliens_of_Kyrgyzstan_56	dataset	2021-09-06	en	http://creativecommons.org/licenses/by/4.0/legalcode	Institute for Biology of National Academy of Sci.	use under CC BY 4.0	http://grbio.org/institution/national-academy-science-kyrgyzstan	urn:lsid:biocol.org:col:13699	kirgalienplants	FRU	Alien plants of Kyrgyzstan	FRU	HumanObservation	Lazkov G.	present		2021	8	20		Asia	Kyrgyzstan	KG	Jalal-Abad	mountains west of Jalal-Abad Town			800	introduced	40.9432	72.8303	WGS84	5	Georgy Lazkov	Georgy Lazkov	0000-0002-3531-8524	Xanthium spinosum L.	Plantae	Tracheophyta	Magnoliopsida	Asterales	Asteraceae	Xanthium	spinosum	species
aliens_of_Kyrgyzstan_57	dataset	2021-09-06	en	http://creativecommons.org/licenses/by/4.0/legalcode	Institute for Biology of National Academy of Sci.	use under CC BY 4.0	http://grbio.org/institution/national-academy-science-kyrgyzstan	urn:lsid:biocol.org:col:13699	kirgalienplants	FRU	Alien plants of Kyrgyzstan	FRU	HumanObservation	Lazkov G.	present		2021	8	20		Asia	Kyrgyzstan	KG	Jalal-Abad	Özgön Town	roadside		1000	introduced	40.7696	73.2969	WGS84	1000	Georgy Lazkov	Georgy Lazkov	0000-0002-3531-8524	Xanthium orientale L.	Plantae	Tracheophyta	Magnoliopsida	Asterales	Asteraceae	Xanthium	orientale	species
aliens_of_Kyrgyzstan_58	dataset	2021-09-06	en	http://creativecommons.org/licenses/by/4.0/legalcode	Institute for Biology of National Academy of Sci.	use under CC BY 4.0	http://grbio.org/institution/national-academy-science-kyrgyzstan	urn:lsid:biocol.org:col:13699	kirgalienplants	FRU	Alien plants of Kyrgyzstan	FRU	HumanObservation	Lazkov G.	present		2021	8	20		Asia	Kyrgyzstan	KG	Osh	Osh Town	roadside		1000	introduced	40.5271	72.8	WGS84	1000	Georgy Lazkov	Georgy Lazkov	0000-0002-3531-8524	Xanthium orientale L.	Plantae	Tracheophyta	Magnoliopsida	Asterales	Asteraceae	Xanthium	orientale	species
aliens_of_Kyrgyzstan_59	dataset	2021-09-06	en	http://creativecommons.org/licenses/by/4.0/legalcode	Institute for Biology of National Academy of Sci.	use under CC BY 4.0	http://grbio.org/institution/national-academy-science-kyrgyzstan	urn:lsid:biocol.org:col:13699	kirgalienplants	FRU	Alien plants of Kyrgyzstan	FRU	HumanObservation	Lazkov G.	present		2021	8	20		Asia	Kyrgyzstan	KG	Jalal-Abad	Özgön Town	roadside		1000	introduced	40.7696	73.2969	WGS84	1000	Georgy Lazkov	Georgy Lazkov	0000-0002-3531-8524	Xanthium spinosum L.	Plantae	Tracheophyta	Magnoliopsida	Asterales	Asteraceae	Xanthium	spinosum	species
aliens_of_Kyrgyzstan_60	dataset	2021-09-06	en	http://creativecommons.org/licenses/by/4.0/legalcode	Institute for Biology of National Academy of Sci.	use under CC BY 4.0	http://grbio.org/institution/national-academy-science-kyrgyzstan	urn:lsid:biocol.org:col:13699	kirgalienplants	FRU	Alien plants of Kyrgyzstan	FRU	HumanObservation	Lazkov G.	present		2021	8	20		Asia	Kyrgyzstan	KG	Osh	Osh Town	roadside		1000	introduced	40.5271	72.8	WGS84	1000	Georgy Lazkov	Georgy Lazkov	0000-0002-3531-8524	Xanthium spinosum L.	Plantae	Tracheophyta	Magnoliopsida	Asterales	Asteraceae	Xanthium	spinosum	species
aliens_of_Kyrgyzstan_61	dataset	2021-09-06	en	http://creativecommons.org/licenses/by/4.0/legalcode	Institute for Biology of National Academy of Sci.	use under CC BY 4.0	http://grbio.org/institution/national-academy-science-kyrgyzstan	urn:lsid:biocol.org:col:13699	kirgalienplants	FRU	Alien plants of Kyrgyzstan	FRU	HumanObservation	Lazkov G.	present		2021			date and month unknown	Asia	Kyrgyzstan	KG	Jalal-Abad	Aktash Village		Беш-Аральский заповедник, близ с. Ак-Таш	1400	introduced	41.7	70.6389	WGS84	200	Alexander Sennikov	Georgy Lazkov	0000-0002-3531-8524	Xanthium orientale L.	Plantae	Tracheophyta	Magnoliopsida	Asterales	Asteraceae	Xanthium	orientale	species
aliens_of_Kyrgyzstan_62	dataset	2021-09-06	en	http://creativecommons.org/licenses/by/4.0/legalcode	Institute for Biology of National Academy of Sci.	use under CC BY 4.0	http://grbio.org/institution/national-academy-science-kyrgyzstan	urn:lsid:biocol.org:col:13699	kirgalienplants	FRU	Alien plants of Kyrgyzstan	FRU	HumanObservation	Lazkov G.	present		2021			date and month unknown	Asia	Kyrgyzstan	KG	Talas	Talas Town		Талас	1200	introduced	42.526	72.2456	WGS84	2000	Alexander Sennikov	Georgy Lazkov	0000-0002-3531-8524	Xanthium orientale L.	Plantae	Tracheophyta	Magnoliopsida	Asterales	Asteraceae	Xanthium	orientale	species
aliens_of_Kyrgyzstan_63	dataset	2021-09-06	en	http://creativecommons.org/licenses/by/4.0/legalcode	Institute for Biology of National Academy of Sci.	use under CC BY 4.0	http://grbio.org/institution/national-academy-science-kyrgyzstan	urn:lsid:biocol.org:col:13699	kirgalienplants	FRU	Alien plants of Kyrgyzstan	FRU	HumanObservation	Lazkov G.	present		2021			date and month unknown	Asia	Kyrgyzstan	KG	Talas	Kara-Buura River		Таласский хр. Ущ. р. Кара-Бура	1300	introduced	42.4824	71.5383	WGS84	1000	Alexander Sennikov	Georgy Lazkov	0000-0002-3531-8524	Xanthium orientale L.	Plantae	Tracheophyta	Magnoliopsida	Asterales	Asteraceae	Xanthium	orientale	species
aliens_of_Kyrgyzstan_64	dataset	2021-09-06	en	http://creativecommons.org/licenses/by/4.0/legalcode	Institute for Biology of National Academy of Sci.	use under CC BY 4.0	http://grbio.org/institution/national-academy-science-kyrgyzstan	urn:lsid:biocol.org:col:13699	kirgalienplants	FRU	Alien plants of Kyrgyzstan	FRU	HumanObservation	Lazkov G.	present		2021			date and month unknown	Asia	Kyrgyzstan	KG	Jalal-Abad	Ala-Buka Village		Ала-Бука	1200	introduced	41.4075	71.4797	WGS84	500	Alexander Sennikov	Georgy Lazkov	0000-0002-3531-8524	Xanthium orientale L.	Plantae	Tracheophyta	Magnoliopsida	Asterales	Asteraceae	Xanthium	orientale	species
aliens_of_Kyrgyzstan_65	dataset	2021-09-06	en	http://creativecommons.org/licenses/by/4.0/legalcode	Institute for Biology of National Academy of Sci.	use under CC BY 4.0	http://grbio.org/institution/national-academy-science-kyrgyzstan	urn:lsid:biocol.org:col:13699	kirgalienplants	FRU	Alien plants of Kyrgyzstan	FRU	HumanObservation	Lazkov G.	present		2021			date and month unknown	Asia	Kyrgyzstan	KG	Jalal-Abad	Kerben Village		Кербен	1300	introduced	41.4923	71.7572	WGS84	1000	Alexander Sennikov	Georgy Lazkov	0000-0002-3531-8524	Xanthium orientale L.	Plantae	Tracheophyta	Magnoliopsida	Asterales	Asteraceae	Xanthium	orientale	species
aliens_of_Kyrgyzstan_66	dataset	2021-09-06	en	http://creativecommons.org/licenses/by/4.0/legalcode	Institute for Biology of National Academy of Sci.	use under CC BY 4.0	http://grbio.org/institution/national-academy-science-kyrgyzstan	urn:lsid:biocol.org:col:13699	kirgalienplants	FRU	Alien plants of Kyrgyzstan	FRU	HumanObservation	Lazkov G.	present		2021			date and month unknown	Asia	Kyrgyzstan	KG	Jalal-Abad	Toktogul Town		Токтогул	1000	introduced	41.8735	72.9451	WGS84	500	Alexander Sennikov	Georgy Lazkov	0000-0002-3531-8524	Xanthium orientale L.	Plantae	Tracheophyta	Magnoliopsida	Asterales	Asteraceae	Xanthium	orientale	species
aliens_of_Kyrgyzstan_67	dataset	2021-09-06	en	http://creativecommons.org/licenses/by/4.0/legalcode	Institute for Biology of National Academy of Sci.	use under CC BY 4.0	http://grbio.org/institution/national-academy-science-kyrgyzstan	urn:lsid:biocol.org:col:13699	kirgalienplants	FRU	Alien plants of Kyrgyzstan	FRU	HumanObservation	Lazkov G.	present		2021			date and month unknown	Asia	Kyrgyzstan	KG	Naryn	Kochkor Village		Кочкорка	1800	introduced	42.2153	75.7559	WGS84	1000	Alexander Sennikov	Georgy Lazkov	0000-0002-3531-8524	Xanthium orientale L.	Plantae	Tracheophyta	Magnoliopsida	Asterales	Asteraceae	Xanthium	orientale	species
aliens_of_Kyrgyzstan_68	dataset	2021-09-06	en	http://creativecommons.org/licenses/by/4.0/legalcode	Institute for Biology of National Academy of Sci.	use under CC BY 4.0	http://grbio.org/institution/national-academy-science-kyrgyzstan	urn:lsid:biocol.org:col:13699	kirgalienplants	FRU	Alien plants of Kyrgyzstan	FRU	HumanObservation	Lazkov G.	present		2021			date and month unknown	Asia	Kyrgyzstan	KG	Ysyk-Köl	Kajisay Village		Каджисай	1800	introduced	42.14	77.18	WGS84	500	Alexander Sennikov	Georgy Lazkov	0000-0002-3531-8524	Xanthium orientale L.	Plantae	Tracheophyta	Magnoliopsida	Asterales	Asteraceae	Xanthium	orientale	species
aliens_of_Kyrgyzstan_69	dataset	2021-09-06	en	http://creativecommons.org/licenses/by/4.0/legalcode	Institute for Biology of National Academy of Sci.	use under CC BY 4.0	http://grbio.org/institution/national-academy-science-kyrgyzstan	urn:lsid:biocol.org:col:13699	kirgalienplants	FRU	Alien plants of Kyrgyzstan	FRU	HumanObservation	Lazkov G.	present		2021			date and month unknown	Asia	Kyrgyzstan	KG	Ysyk-Köl	Karakol Town		Пржевальск	1800	introduced	42.484	78.34	WGS84	2000	Alexander Sennikov	Georgy Lazkov	0000-0002-3531-8524	Xanthium orientale L.	Plantae	Tracheophyta	Magnoliopsida	Asterales	Asteraceae	Xanthium	orientale	species
aliens_of_Kyrgyzstan_70	dataset	2021-09-06	en	http://creativecommons.org/licenses/by/4.0/legalcode	Institute for Biology of National Academy of Sci.	use under CC BY 4.0	http://grbio.org/institution/national-academy-science-kyrgyzstan	urn:lsid:biocol.org:col:13699	kirgalienplants	FRU	Alien plants of Kyrgyzstan	FRU	HumanObservation	Lazkov G.	present		2021			date and month unknown	Asia	Kyrgyzstan	KG	Batken	Batken Town		Баткен	1200	introduced	40.0488	70.8296	WGS84	500	Alexander Sennikov	Georgy Lazkov	0000-0002-3531-8524	Xanthium orientale L.	Plantae	Tracheophyta	Magnoliopsida	Asterales	Asteraceae	Xanthium	orientale	species
aliens_of_Kyrgyzstan_71	dataset	2021-09-06	en	http://creativecommons.org/licenses/by/4.0/legalcode	Institute for Biology of National Academy of Sci.	use under CC BY 4.0	http://grbio.org/institution/national-academy-science-kyrgyzstan	urn:lsid:biocol.org:col:13699	kirgalienplants	FRU	Alien plants of Kyrgyzstan	FRU	HumanObservation	Lazkov G.	present		2021			date and month unknown	Asia	Kyrgyzstan	KG	Chü	Ak-Tuz Village		Ак-Тюз	2200	introduced	42.8796	76.135	WGS84	250	Alexander Sennikov	Georgy Lazkov	0000-0002-3531-8524	Xanthium orientale L.	Plantae	Tracheophyta	Magnoliopsida	Asterales	Asteraceae	Xanthium	orientale	species
aliens_of_Kyrgyzstan_72	dataset	2021-09-06	en	http://creativecommons.org/licenses/by/4.0/legalcode	Institute for Biology of National Academy of Sci.	use under CC BY 4.0	http://grbio.org/institution/national-academy-science-kyrgyzstan	urn:lsid:biocol.org:col:13699	kirgalienplants	FRU	Alien plants of Kyrgyzstan	FRU	HumanObservation	Lazkov G.	present		2021			date and month unknown	Asia	Kyrgyzstan	KG	Chü	Kant Town		Кант	800	introduced	42.8896	74.8426	WGS84	1000	Alexander Sennikov	Georgy Lazkov	0000-0002-3531-8524	Xanthium orientale L.	Plantae	Tracheophyta	Magnoliopsida	Asterales	Asteraceae	Xanthium	orientale	species
aliens_of_Kyrgyzstan_73	dataset	2021-09-06	en	http://creativecommons.org/licenses/by/4.0/legalcode	Institute for Biology of National Academy of Sci.	use under CC BY 4.0	http://grbio.org/institution/national-academy-science-kyrgyzstan	urn:lsid:biocol.org:col:13699	kirgalienplants	FRU	Alien plants of Kyrgyzstan	FRU	HumanObservation	Lazkov G.	present		2021			date and month unknown	Asia	Kyrgyzstan	KG	Chü	Tokmok Town		Токмак	800	introduced	42.83	75.23	WGS84	2000	Alexander Sennikov	Georgy Lazkov	0000-0002-3531-8524	Xanthium orientale L.	Plantae	Tracheophyta	Magnoliopsida	Asterales	Asteraceae	Xanthium	orientale	species
aliens_of_Kyrgyzstan_74	dataset	2021-09-06	en	http://creativecommons.org/licenses/by/4.0/legalcode	Institute for Biology of National Academy of Sci.	use under CC BY 4.0	http://grbio.org/institution/national-academy-science-kyrgyzstan	urn:lsid:biocol.org:col:13699	kirgalienplants	FRU	Alien plants of Kyrgyzstan	FRU	HumanObservation	Lazkov G.	present		2021	7	8		Asia	Kyrgyzstan	KG	Jalal-Abad	Sary-Chelek Nature Reserve, near Kyla-Köl Lake	roadside	Сары-Челекский заповедник, у озера Кыла-Кель	1880	introduced	41.8601	71.9762	WGS84	5	Georgy Lazkov	Georgy Lazkov	0000-0002-3531-8524	Bunias orientalis L.	Plantae	Tracheophyta	Magnoliopsida	Brassicales	Brassicaceae	Bunias	orientalis	species
aliens_of_Kyrgyzstan_75	dataset	2021-09-06	en	http://creativecommons.org/licenses/by/4.0/legalcode	Institute for Biology of National Academy of Sci.	use under CC BY 4.0	http://grbio.org/institution/national-academy-science-kyrgyzstan	urn:lsid:biocol.org:col:13699	kirgalienplants	FRU	Alien plants of Kyrgyzstan	FRU	HumanObservation	Lazkov G.	present		2018			day and month unknown	Asia	Kyrgyzstan	KG	Jalal-Abad	Arkyt Village			1300	introduced	41.8035	71.9615	WGS84	100	Alexander Sennikov	Georgy Lazkov	0000-0002-3531-8524	Bunias orientalis L.	Plantae	Tracheophyta	Magnoliopsida	Brassicales	Brassicaceae	Bunias	orientalis	species
aliens_of_Kyrgyzstan_76	dataset	2021-09-06	en	http://creativecommons.org/licenses/by/4.0/legalcode	Plantarium	use under CC BY 4.0	Plantarium	Plantarium	kirgalienplants	Plantarium	Alien plants of Kyrgyzstan	Plantarium	HumanObservation	Chulanova G.	present		2015	9	5		Asia	Kyrgyzstan	KG	Chü	south-east of Orto-Say Village		Чуйская обл., склон южнее с. Орто-Сай, р-н флагштока	1100	introduced	42.7966	74.6051	WGS84	50	Alexander Sennikov	Galina Chulanova		Xanthium spinosum L.	Plantae	Tracheophyta	Magnoliopsida	Asterales	Asteraceae	Xanthium	spinosum	species	https://www.plantarium.ru/page/image/id/400716.html
aliens_of_Kyrgyzstan_77	dataset	2021-09-06	en	http://creativecommons.org/licenses/by/4.0/legalcode	Institute for Biology of National Academy of Sci.	use under CC BY 4.0	http://grbio.org/institution/national-academy-science-kyrgyzstan	urn:lsid:biocol.org:col:13699	kirgalienplants	FRU	Alien plants of Kyrgyzstan	FRU	HumanObservation	Deza M.	present	Deza MI (1983) Weedy plants of Kirghizia. Kyrgyzstan, Frunze, 152 pp. [In Russian].	1980			exact date unknown	Asia	Kyrgyzstan	KG	Talas	Talas Depression		Таласская область	1200	introduced	42.52	72.22	WGS84	10000	Alexander Sennikov	Maria Deza		Xanthium spinosum L.	Plantae	Tracheophyta	Magnoliopsida	Asterales	Asteraceae	Xanthium	spinosum	species
aliens_of_Kyrgyzstan_78	dataset	2021-09-06	en	http://creativecommons.org/licenses/by/4.0/legalcode	Moscow State University	use under CC BY 4.0	http://grbio.org/institution/moscow-state-university	urn:lsid:biocol.org:col:15550	kirgalienplants	MW	Alien plants of Kyrgyzstan	MW	PreservedSpecimen	Seregin A.P.	present		2016	7	25		Asia	Kyrgyzstan	KG	Jalal-Abad	Chatkal Range foothills: 1 km to E from Aflatun, flood plain meadow of the Aflatun River			1000	introduced	41.6417	71.9786	WGS84	10	Alexei Seregin	Alexander Sennikov	0000-0001-6664-7657	Erigeron annuus (L.) Desf.	Plantae	Tracheophyta	Magnoliopsida	Asterales	Asteraceae	Erigeron	annuus	species	https://plant.depo.msu.ru/open/public/item/MW0881956	MW0881956
aliens_of_Kyrgyzstan_79	dataset	2021-09-06	en	http://creativecommons.org/licenses/by/4.0/legalcode	iNaturalist	use under CC BY 4.0	iNaturalist	iNaturalist	kirgalienplants	iNaturalist	Alien plants of Kyrgyzstan	iNaturalist	HumanObservation	Mambetalieva A.	present		2020	10	16		Asia	Kyrgyzstan	KG	Jalal-Abad	Jalal-Abad Town			800	introduced	40.9202	73.0215	WGS84	10	Mambetalieva, A.	Aisada Mambetalieva		Xanthium spinosum L.	Plantae	Tracheophyta	Magnoliopsida	Asterales	Asteraceae	Xanthium	spinosum	species	https://www.inaturalist.org/observations/62692452
aliens_of_Kyrgyzstan_80	dataset	2021-09-08	en	http://creativecommons.org/licenses/by/4.0/legalcode	Institute for Biology of National Academy of Sci.	use under CC BY 4.0	http://grbio.org/institution/national-academy-science-kyrgyzstan	urn:lsid:biocol.org:col:13699	kirgalienplants	FRU	Alien plants of Kyrgyzstan	FRU	HumanObservation	Lazkov G.	present		2021	8	8		Asia	Kyrgyzstan	KG	Chü	Sokuluk Village		Сокулук	800	introduced	42.857	74.3	WGS84	1000	Alexander Sennikov	Georgy Lazkov	0000-0002-3531-8524	Xanthium orientale L.	Plantae	Tracheophyta	Magnoliopsida	Asterales	Asteraceae	Xanthium	orientale	species
aliens_of_Kyrgyzstan_81	dataset	2021-09-08	en	http://creativecommons.org/licenses/by/4.0/legalcode	Institute for Biology of National Academy of Sci.	use under CC BY 4.0	http://grbio.org/institution/national-academy-science-kyrgyzstan	urn:lsid:biocol.org:col:13699	kirgalienplants	FRU	Alien plants of Kyrgyzstan	FRU	HumanObservation	Lazkov G.	present		2021	8	8		Asia	Kyrgyzstan	KG	Chü	Sokuluk Village		Сокулук	800	introduced	42.857	74.3	WGS84	1000	Alexander Sennikov	Georgy Lazkov	0000-0002-3531-8524	Xanthium spinosum L.	Plantae	Tracheophyta	Magnoliopsida	Asterales	Asteraceae	Xanthium	spinosum	species
aliens_of_Kyrgyzstan_82	dataset	2021-09-08	en	http://creativecommons.org/licenses/by/4.0/legalcode	Institute for Biology of National Academy of Sci.	use under CC BY 4.0	http://grbio.org/institution/national-academy-science-kyrgyzstan	urn:lsid:biocol.org:col:13699	kirgalienplants	FRU	Alien plants of Kyrgyzstan	FRU	HumanObservation	Ganybaeva M.	present		2021				Asia	Kyrgyzstan	KG	Chü	Kyrgyz Range (N side), Taldy-Bulak		Талды-булак	1250	introduced	42.6602	73.9438	WGS84	50	Alexander Sennikov	Georgy Lazkov	0000-0002-3531-8524	Xanthium spinosum L.	Plantae	Tracheophyta	Magnoliopsida	Asterales	Asteraceae	Xanthium	spinosum	species
aliens_of_Kyrgyzstan_83	dataset	2021-09-17	en	http://creativecommons.org/licenses/by/4.0/legalcode	Institute for Biology of National Academy of Sci.	use under CC BY 4.0	http://grbio.org/institution/national-academy-science-kyrgyzstan	urn:lsid:biocol.org:col:13699	kirgalienplants	FRU	Alien plants of Kyrgyzstan	FRU	HumanObservation	Lazkov G.	present		2021	8	16		Asia	Kyrgyzstan	KG	Ysyk-Köl	Barskoon Ravine near the village			1800	introduced	42.147	77.5865	WGS84	1000	Alexander Sennikov	Georgy Lazkov	0000-0002-3531-8524	Xanthium orientale L.	Plantae	Tracheophyta	Magnoliopsida	Asterales	Asteraceae	Xanthium	orientale	species
aliens_of_Kyrgyzstan_84	dataset	2021-09-17	en	http://creativecommons.org/licenses/by/4.0/legalcode	Institute for Biology of National Academy of Sci.	use under CC BY 4.0	http://grbio.org/institution/national-academy-science-kyrgyzstan	urn:lsid:biocol.org:col:13699	kirgalienplants	FRU	Alien plants of Kyrgyzstan	FRU	HumanObservation	Lazkov G.	present		2021	8	16		Asia	Kyrgyzstan	KG	Ysyk-Köl	Bokonbaevo Village			1800	introduced	42.12	76.986	WGS84	1000	Alexander Sennikov	Georgy Lazkov	0000-0002-3531-8524	Xanthium orientale L.	Plantae	Tracheophyta	Magnoliopsida	Asterales	Asteraceae	Xanthium	orientale	species
aliens_of_Kyrgyzstan_85	dataset	2021-09-17	en	http://creativecommons.org/licenses/by/4.0/legalcode	Institute for Biology of National Academy of Sci.	use under CC BY 4.0	http://grbio.org/institution/national-academy-science-kyrgyzstan	urn:lsid:biocol.org:col:13699	kirgalienplants	FRU	Alien plants of Kyrgyzstan	FRU	HumanObservation	Lazkov G.	present		2021	8	16		Asia	Kyrgyzstan	KG	Ysyk-Köl	Kara-Koo Village			1750	introduced	42.211	76.634	WGS84	500	Alexander Sennikov	Georgy Lazkov	0000-0002-3531-8524	Xanthium orientale L.	Plantae	Tracheophyta	Magnoliopsida	Asterales	Asteraceae	Xanthium	orientale	species
aliens_of_Kyrgyzstan_86	dataset	2021-09-17	en	http://creativecommons.org/licenses/by/4.0/legalcode	Institute for Biology of National Academy of Sci.	use under CC BY 4.0	http://grbio.org/institution/national-academy-science-kyrgyzstan	urn:lsid:biocol.org:col:13699	kirgalienplants	FRU	Alien plants of Kyrgyzstan	FRU	HumanObservation	Lazkov G.	present		2021	8	16		Asia	Kyrgyzstan	KG	Ysyk-Köl	Ottuk Village			1700	introduced	42.309	76.296	WGS84	500	Alexander Sennikov	Georgy Lazkov	0000-0002-3531-8524	Xanthium orientale L.	Plantae	Tracheophyta	Magnoliopsida	Asterales	Asteraceae	Xanthium	orientale	species
aliens_of_Kyrgyzstan_87	dataset	2021-09-17	en	http://creativecommons.org/licenses/by/4.0/legalcode	Institute for Biology of National Academy of Sci.	use under CC BY 4.0	http://grbio.org/institution/national-academy-science-kyrgyzstan	urn:lsid:biocol.org:col:13699	kirgalienplants	FRU	Alien plants of Kyrgyzstan	FRU	HumanObservation	Lazkov G.	present		2021	8	16		Asia	Kyrgyzstan	KG	Chü	Boom Ravine, Kyz-Küyöö			1400	introduced	42.6442	75.8611	WGS84	100	Alexander Sennikov	Georgy Lazkov	0000-0002-3531-8524	Xanthium orientale L.	Plantae	Tracheophyta	Magnoliopsida	Asterales	Asteraceae	Xanthium	orientale	species
aliens_of_Kyrgyzstan_88	dataset	2021-09-17	en	http://creativecommons.org/licenses/by/4.0/legalcode	Institute for Biology of National Academy of Sci.	use under CC BY 4.0	http://grbio.org/institution/national-academy-science-kyrgyzstan	urn:lsid:biocol.org:col:13699	kirgalienplants	FRU	Alien plants of Kyrgyzstan	FRU	HumanObservation	Lazkov G.	present		2021	8	16		Asia	Kyrgyzstan	KG	Ysyk-Köl	Boom Ravine			1550	introduced	42.4682	75.9012	WGS84	100	Alexander Sennikov	Georgy Lazkov	0000-0002-3531-8524	Xanthium orientale L.	Plantae	Tracheophyta	Magnoliopsida	Asterales	Asteraceae	Xanthium	orientale	species
aliens_of_Kyrgyzstan_89	dataset	2021-09-17	en	http://creativecommons.org/licenses/by/4.0/legalcode	Komarov Botanical Institute of RAS	use under CC BY 4.0	http://grbio.org/institution/v-l-komarov-botanical-institute	urn:lsid:biocol.org:col:15844	kirgalienplants	LE	Alien plants of Kyrgyzstan	LE	PreservedSpecimen	Krasnov A.	present		1886	8	15		Asia	Kyrgyzstan	KG	Ysyk-Köl	Karakol Town		Каракол	1800	introduced	42.484	78.34	WGS84	2000	Alexander Sennikov	Georgy Lazkov	0000-0002-3531-8524	Xanthium strumarium L.	Plantae	Tracheophyta	Magnoliopsida	Asterales	Asteraceae	Xanthium	strumarium	species
aliens_of_Kyrgyzstan_90	dataset	2021-09-17	en	http://creativecommons.org/licenses/by/4.0/legalcode	Komarov Botanical Institute of RAS	use under CC BY 4.0	http://grbio.org/institution/v-l-komarov-botanical-institute	urn:lsid:biocol.org:col:15844	kirgalienplants	LE	Alien plants of Kyrgyzstan	LE	PreservedSpecimen	Massagetov P.	present		1925	8	12		Asia	Kyrgyzstan	KG	Jalal-Abad	Jajal-Abad Town		Джалал-Абад, сорное	800	introduced	40.943	72.97	WGS84	500	Alexander Sennikov	Georgy Lazkov	0000-0002-3531-8524	Xanthium strumarium L.	Plantae	Tracheophyta	Magnoliopsida	Asterales	Asteraceae	Xanthium	strumarium	species
aliens_of_Kyrgyzstan_91	dataset	2021-09-17	en	http://creativecommons.org/licenses/by/4.0/legalcode	Komarov Botanical Institute of RAS	use under CC BY 4.0	http://grbio.org/institution/v-l-komarov-botanical-institute	urn:lsid:biocol.org:col:15844	kirgalienplants	LE	Alien plants of Kyrgyzstan	LE	PreservedSpecimen	Minkwitz Z.A. von	present		1911	7	24		Asia	Kyrgyzstan	KG	Jalal-Abad	Chyng-Say, south of Tash-Kömür		Долина Нарына близ оврага Шинг-сай	600	introduced	41.3179	72.2	WGS84	100	Alexander Sennikov	Alexander Sennikov	0000-0001-6664-7657	Xanthium strumarium L.	Plantae	Tracheophyta	Magnoliopsida	Asterales	Asteraceae	Xanthium	strumarium	species
aliens_of_Kyrgyzstan_92	dataset	2021-09-17	en	http://creativecommons.org/licenses/by/4.0/legalcode	Komarov Botanical Institute of RAS	use under CC BY 4.0	http://grbio.org/institution/v-l-komarov-botanical-institute	urn:lsid:biocol.org:col:15844	kirgalienplants	LE	Alien plants of Kyrgyzstan	LE	PreservedSpecimen	Kalinina A. et al.	present		1945	9	10		Asia	Kyrgyzstan	KG	Jalal-Abad	Gava-Say	roadside	Близ полей лесхоза Гава, у дороги	1400	introduced	41.23	72.855	WGS84	500	Alexander Sennikov	Alexander Sennikov	0000-0001-6664-7657	Xanthium strumarium L.	Plantae	Tracheophyta	Magnoliopsida	Asterales	Asteraceae	Xanthium	strumarium	species
aliens_of_Kyrgyzstan_93	dataset	2021-09-17	en	http://creativecommons.org/licenses/by/4.0/legalcode	Komarov Botanical Institute of RAS	use under CC BY 4.0	http://grbio.org/institution/v-l-komarov-botanical-institute	urn:lsid:biocol.org:col:15844	kirgalienplants	LE	Alien plants of Kyrgyzstan	LE	PreservedSpecimen	Armand	present		1945	10	10		Asia	Kyrgyzstan	KG	Jalal-Abad	Maili-Say, Toskool		Майлисай, Тоскоул, пойма р. Хазан-Мазар, засоренное разнотравье	1000	introduced	41.196	72.6925	WGS84	200	Alexander Sennikov	Alexander Sennikov	0000-0001-6664-7657	Xanthium strumarium L.	Plantae	Tracheophyta	Magnoliopsida	Asterales	Asteraceae	Xanthium	strumarium	species
aliens_of_Kyrgyzstan_94	dataset	2021-09-17	en	http://creativecommons.org/licenses/by/4.0/legalcode	Komarov Botanical Institute of RAS	use under CC BY 4.0	http://grbio.org/institution/v-l-komarov-botanical-institute	urn:lsid:biocol.org:col:15844	kirgalienplants	LE	Alien plants of Kyrgyzstan	LE	PreservedSpecimen	Titov V.	present		1914	7	22		Asia	Kyrgyzstan	KG	Chü	Between Bisjkek and Ysyk-Ata		окр. г. Пишпека, степь по дороге на Арасан [Иссык-Ата]	800	introduced	42.828	74.88	WGS84	2000	Alexander Sennikov	Alexander Sennikov	0000-0001-6664-7657	Xanthium strumarium L.	Plantae	Tracheophyta	Magnoliopsida	Asterales	Asteraceae	Xanthium	strumarium	species
aliens_of_Kyrgyzstan_95	dataset	2021-09-17	en	http://creativecommons.org/licenses/by/4.0/legalcode	Komarov Botanical Institute of RAS	use under CC BY 4.0	http://grbio.org/institution/v-l-komarov-botanical-institute	urn:lsid:biocol.org:col:15844	kirgalienplants	LE	Alien plants of Kyrgyzstan	LE	PreservedSpecimen	Sapozhnikov V. | Schischkin B.	present		1912	8	21		Asia	Kyrgyzstan	KG	Ysyk-Köl	Between Korumdu Village and Cholpon-Ata Village		Пржевальский у., между ст. Курунды и ст. Чолпон-ата	1700	introduced	42.658	77.21	WGS84	2000	Alexander Sennikov	Alexander Sennikov	0000-0001-6664-7657	Xanthium strumarium L.	Plantae	Tracheophyta	Magnoliopsida	Asterales	Asteraceae	Xanthium	strumarium	species
aliens_of_Kyrgyzstan_96	dataset	2021-09-17	en	http://creativecommons.org/licenses/by/4.0/legalcode	Komarov Botanical Institute of RAS	use under CC BY 4.0	http://grbio.org/institution/v-l-komarov-botanical-institute	urn:lsid:biocol.org:col:15844	kirgalienplants	LE	Alien plants of Kyrgyzstan	LE	PreservedSpecimen	Zinserling T.	present		1916	7	15		Asia	Kyrgyzstan	KG	Chü	Chü River, At-Bashy		Атбашинская бот. ст., пойма р. Чу	600	introduced	43.1207	74.5795	WGS84	1000	Alexander Sennikov	Alexander Sennikov	0000-0001-6664-7657	Xanthium strumarium L.	Plantae	Tracheophyta	Magnoliopsida	Asterales	Asteraceae	Xanthium	strumarium	species
aliens_of_Kyrgyzstan_97	dataset	2021-09-17	en	http://creativecommons.org/licenses/by/4.0/legalcode	Moscow State University	use under CC BY 4.0	http://grbio.org/institution/moscow-state-university	urn:lsid:biocol.org:col:15550	kirgalienplants	MW	Alien plants of Kyrgyzstan	MW	PreservedSpecimen	Seregin A.P.	present		2016	7	25		Asia	Kyrgyzstan	KG	Jalal-Abad	Kasan-Say River, 9 km downstream the Terek-Say River	roadside	Чаткальский хр., левый берег р. Касан-сай, 9 км ниже устья Терек-Сай	1300	introduced	41.4275	71.2442	WGS84	5	Alexei Seregin	Alexei Seregin	0000-0002-1824-7453	Xanthium spinosum L.	Plantae	Tracheophyta	Magnoliopsida	Asterales	Asteraceae	Xanthium	spinosum	species	https://plant.depo.msu.ru/open/public/item/MW0883209	MW0883209
aliens_of_Kyrgyzstan_98	dataset	2021-09-17	en	http://creativecommons.org/licenses/by/4.0/legalcode	Moscow State University	use under CC BY 4.0	http://grbio.org/institution/moscow-state-university	urn:lsid:biocol.org:col:15550	kirgalienplants	MW	Alien plants of Kyrgyzstan	MW	PreservedSpecimen	Seregin A.P.	present		2016	7	31		Asia	Kyrgyzstan	KG	Jalal-Abad	7 km NE of Arkhangelskoe Village		7 км к СВ от с. Архангельское, обочина дороги на Казарман	1620	introduced	41.2047	73.4008	WGS84	5	Alexei Seregin	Alexander Sennikov	0000-0001-6664-7657	Xanthium orientale L.	Plantae	Tracheophyta	Magnoliopsida	Asterales	Asteraceae	Xanthium	orientale	species
aliens_of_Kyrgyzstan_99	dataset	2021-09-19	en	http://creativecommons.org/licenses/by/4.0/legalcode	Institute for Biology of National Academy of Sci.	use under CC BY 4.0	http://grbio.org/institution/national-academy-science-kyrgyzstan	urn:lsid:biocol.org:col:13699	kirgalienplants	FRU	Alien plants of Kyrgyzstan	FRU	HumanObservation	Lazkov G.	present		2021	9	19		Asia	Kyrgyzstan	KG	Chü	Boom Ravine, entrance			1300	introduced	42.6945	75.8767	WGS84	100	Alexander Sennikov	Georgy Lazkov	0000-0002-3531-8524	Xanthium orientale L.	Plantae	Tracheophyta	Magnoliopsida	Asterales	Asteraceae	Xanthium	orientale	species
aliens_of_Kyrgyzstan_100	dataset	2021-09-23	en	http://creativecommons.org/licenses/by/4.0/legalcode	Institute for Biology of National Academy of Sci.	use under CC BY 4.0	http://grbio.org/institution/national-academy-science-kyrgyzstan	urn:lsid:biocol.org:col:13699	kirgalienplants	FRU	Alien plants of Kyrgyzstan	FRU	HumanObservation	Lazkov G.	present		2021	9	23		Asia	Kyrgyzstan	KG	Batken	Ak-Tatyr Village			1200	introduced	39.9613	70.4782	WGS84	200	Alexander Sennikov	Georgy Lazkov	0000-0002-3531-8524	Xanthium spinosum L.	Plantae	Tracheophyta	Magnoliopsida	Asterales	Asteraceae	Xanthium	spinosum	species
aliens_of_Kyrgyzstan_101	dataset	2021-09-23	en	http://creativecommons.org/licenses/by/4.0/legalcode	Institute for Biology of National Academy of Sci.	use under CC BY 4.0	http://grbio.org/institution/national-academy-science-kyrgyzstan	urn:lsid:biocol.org:col:13699	kirgalienplants	FRU	Alien plants of Kyrgyzstan	FRU	HumanObservation	Lazkov G.	present		2021	9	23		Asia	Kyrgyzstan	KG	Batken	Ak-Tatyr Village			1200	introduced	39.9613	70.4782	WGS84	200	Alexander Sennikov	Georgy Lazkov	0000-0002-3531-8524	Xanthium orientale L.	Plantae	Tracheophyta	Magnoliopsida	Asterales	Asteraceae	Xanthium	orientale	species
aliens_of_Kyrgyzstan_102	dataset	2021-09-24	en	http://creativecommons.org/licenses/by/4.0/legalcode	Institute for Biology of National Academy of Sci.	use under CC BY 4.0	http://grbio.org/institution/national-academy-science-kyrgyzstan	urn:lsid:biocol.org:col:13699	kirgalienplants	FRU	Alien plants of Kyrgyzstan	FRU	HumanObservation	Lazkov G.	present		2021	9	24		Asia	Kyrgyzstan	KG	Batken	east of Ravat Village			1500	introduced	39.9446	70.2675	WGS84	5	Georgy Lazkov	Georgy Lazkov	0000-0002-3531-8524	Xanthium spinosum L.	Plantae	Tracheophyta	Magnoliopsida	Asterales	Asteraceae	Xanthium	spinosum	species
aliens_of_Kyrgyzstan_103	dataset	2021-09-25	en	http://creativecommons.org/licenses/by/4.0/legalcode	Institute for Biology of National Academy of Sci.	use under CC BY 4.0	http://grbio.org/institution/national-academy-science-kyrgyzstan	urn:lsid:biocol.org:col:13699	kirgalienplants	FRU	Alien plants of Kyrgyzstan	FRU	HumanObservation	Lazkov G.	present		2021	9	25		Asia	Kyrgyzstan	KG	Batken	Ak-Turpak Village			800	introduced	40.2056	71.0297	WGS84	200	Alexander Sennikov	Georgy Lazkov	0000-0002-3531-8524	Xanthium orientale L.	Plantae	Tracheophyta	Magnoliopsida	Asterales	Asteraceae	Xanthium	orientale	species
aliens_of_Kyrgyzstan_104	dataset	2021-09-25	en	http://creativecommons.org/licenses/by/4.0/legalcode	Institute for Biology of National Academy of Sci.	use under CC BY 4.1	http://grbio.org/institution/national-academy-science-kyrgyzstan	urn:lsid:biocol.org:col:13700	kirgalienplants	FRU	Alien plants of Kyrgyzstan	FRU	HumanObservation	Lazkov G.	present		2021	9	25		Asia	Kyrgyzstan	KG	Batken	Jash-Tilek Village			550	introduced	40.3125	71.2377	WGS84	500	Alexander Sennikov	Georgy Lazkov	0000-0002-3531-8524	Xanthium orientale L.	Plantae	Tracheophyta	Magnoliopsida	Asterales	Asteraceae	Xanthium	orientale	species
aliens_of_Kyrgyzstan_105	dataset	2021-09-25	en	http://creativecommons.org/licenses/by/4.0/legalcode	Institute for Biology of National Academy of Sci.	use under CC BY 4.2	http://grbio.org/institution/national-academy-science-kyrgyzstan	urn:lsid:biocol.org:col:13701	kirgalienplants	FRU	Alien plants of Kyrgyzstan	FRU	HumanObservation	Lazkov G.	present		2021	9	25		Asia	Kyrgyzstan	KG	Batken	Kyrgyz-Kyshtak Village			550	introduced	40.2975	71.3297	WGS84	250	Alexander Sennikov	Georgy Lazkov	0000-0002-3531-8524	Xanthium orientale L.	Plantae	Tracheophyta	Magnoliopsida	Asterales	Asteraceae	Xanthium	orientale	species
aliens_of_Kyrgyzstan_106	dataset	2021-09-25	en	http://creativecommons.org/licenses/by/4.0/legalcode	Institute for Biology of National Academy of Sci.	use under CC BY 4.3	http://grbio.org/institution/national-academy-science-kyrgyzstan	urn:lsid:biocol.org:col:13702	kirgalienplants	FRU	Alien plants of Kyrgyzstan	FRU	HumanObservation	Lazkov G.	present		2021	9	25		Asia	Kyrgyzstan	KG	Batken	Kadamjay Town			1050	introduced	40.131	71.7215	WGS84	250	Alexander Sennikov	Georgy Lazkov	0000-0002-3531-8524	Xanthium orientale L.	Plantae	Tracheophyta	Magnoliopsida	Asterales	Asteraceae	Xanthium	orientale	species
aliens_of_Kyrgyzstan_107	dataset	2021-09-25	en	http://creativecommons.org/licenses/by/4.0/legalcode	Institute for Biology of National Academy of Sci.	use under CC BY 4.4	http://grbio.org/institution/national-academy-science-kyrgyzstan	urn:lsid:biocol.org:col:13703	kirgalienplants	FRU	Alien plants of Kyrgyzstan	FRU	HumanObservation	Lazkov G.	present		2021	9	25		Asia	Kyrgyzstan	KG	Batken	Kok-Talaa Village			800	introduced	40.2168	71.8722	WGS84	200	Alexander Sennikov	Georgy Lazkov	0000-0002-3531-8524	Xanthium orientale L.	Plantae	Tracheophyta	Magnoliopsida	Asterales	Asteraceae	Xanthium	orientale	species
aliens_of_Kyrgyzstan_108	dataset	2021-09-25	en	http://creativecommons.org/licenses/by/4.0/legalcode	Institute for Biology of National Academy of Sci.	use under CC BY 4.5	http://grbio.org/institution/national-academy-science-kyrgyzstan	urn:lsid:biocol.org:col:13704	kirgalienplants	FRU	Alien plants of Kyrgyzstan	FRU	HumanObservation	Lazkov G.	present		2021	9	25		Asia	Kyrgyzstan	KG	Batken	Uch-Korgon Village			950	introduced	40.2427	72.0512	WGS84	1000	Alexander Sennikov	Georgy Lazkov	0000-0002-3531-8524	Xanthium orientale L.	Plantae	Tracheophyta	Magnoliopsida	Asterales	Asteraceae	Xanthium	orientale	species
aliens_of_Kyrgyzstan_109	dataset	2021-09-25	en	http://creativecommons.org/licenses/by/4.0/legalcode	Institute for Biology of National Academy of Sci.	use under CC BY 4.6	http://grbio.org/institution/national-academy-science-kyrgyzstan	urn:lsid:biocol.org:col:13705	kirgalienplants	FRU	Alien plants of Kyrgyzstan	FRU	HumanObservation	Lazkov G.	present		2021	9	25		Asia	Kyrgyzstan	KG	Batken	Kyzyl-Kyya Town			950	introduced	40.2677	72.1258	WGS84	1500	Alexander Sennikov	Georgy Lazkov	0000-0002-3531-8524	Xanthium orientale L.	Plantae	Tracheophyta	Magnoliopsida	Asterales	Asteraceae	Xanthium	orientale	species
aliens_of_Kyrgyzstan_110	dataset	2021-09-25	en	http://creativecommons.org/licenses/by/4.0/legalcode	Institute for Biology of National Academy of Sci.	use under CC BY 4.7	http://grbio.org/institution/national-academy-science-kyrgyzstan	urn:lsid:biocol.org:col:13706	kirgalienplants	FRU	Alien plants of Kyrgyzstan	FRU	HumanObservation	Lazkov G.	present		2021	9	25		Asia	Kyrgyzstan	KG	Osh	Nookat Town			1270	introduced	40.2657	72.6172	WGS84	1000	Alexander Sennikov	Georgy Lazkov	0000-0002-3531-8524	Xanthium orientale L.	Plantae	Tracheophyta	Magnoliopsida	Asterales	Asteraceae	Xanthium	orientale	species
aliens_of_Kyrgyzstan_111	dataset	2021-09-25	en	http://creativecommons.org/licenses/by/4.0/legalcode	Institute for Biology of National Academy of Sci.	use under CC BY 4.8	http://grbio.org/institution/national-academy-science-kyrgyzstan	urn:lsid:biocol.org:col:13707	kirgalienplants	FRU	Alien plants of Kyrgyzstan	FRU	HumanObservation	Lazkov G.	present		2021	9	25		Asia	Kyrgyzstan	KG	Osh	Bel-Oruk Village			1400	introduced	40.2724	72.4708	WGS84	500	Alexander Sennikov	Georgy Lazkov	0000-0002-3531-8524	Xanthium orientale L.	Plantae	Tracheophyta	Magnoliopsida	Asterales	Asteraceae	Xanthium	orientale	species
aliens_of_Kyrgyzstan_112	dataset	2021-10-20	en	http://creativecommons.org/licenses/by/4.0/legalcode	Institute for Biology of National Academy of Sci.	use under CC BY 4.0	http://grbio.org/institution/national-academy-science-kyrgyzstan	urn:lsid:biocol.org:col:13699	kirgalienplants	FRU	Alien plants of Kyrgyzstan	FRU	HumanObservation	Popova I.V.	present		1986				Asia	Kyrgyzstan	KG	Bishkek City	Botanical Garden	ruderal places		800	introduced	42.859	74.59	WGS84	100	Alexander Sennikov	Alexander Sennikov	0000-0001-6664-7657	Erigeron lilacinus (Sennikov & Kurtto) Sennikov	Plantae	Tracheophyta	Magnoliopsida	Asterales	Asteraceae	Erigeron	lilacinus	species
aliens_of_Kyrgyzstan_113	dataset	2021-10-20	en	http://creativecommons.org/licenses/by/4.0/legalcode	Institute for Biology of National Academy of Sci.	use under CC BY 4.0	http://grbio.org/institution/national-academy-science-kyrgyzstan	urn:lsid:biocol.org:col:13699	kirgalienplants	FRU	Alien plants of Kyrgyzstan	FRU	HumanObservation	Popova I.V.	present		2021				Asia	Kyrgyzstan	KG	Bishkek City	Botanical Garden	ruderal places		800	introduced	42.859	74.59	WGS84	100	Alexander Sennikov	Alexander Sennikov	0000-0001-6664-7657	Erigeron lilacinus (Sennikov & Kurtto) Sennikov	Plantae	Tracheophyta	Magnoliopsida	Asterales	Asteraceae	Erigeron	lilacinus	species
